# Supplementary material for: A new process for the stabilization of vertically aligned GdB6 nanorods and their field emission properties
Source: Royal Society of Chemistry journal article supplement (doi:10.1039/d0ce00591f), 2020-01-01
Supplement: d0ce00591f1.pdf [file d0ce00591f1.pdf]

## Supplementary

### New Process for Stabilization of Vertically Aligned GdB<sub>6</sub> nanorods and their Field Emission

#### Properties

Krishna K. Yadav, M. Sreekanth, Ankush, S. Ghosh, Menaka Jha

The Si- substrate utilized for the GdB<sub>6</sub> film fabrication was cleaned with acetone, water, isopropanol, HF and Piranha solutions. First, Si-substrate introduced in preheated acetone at 50 °C for 30 min and then cleaned with water and isopropanol. In the second step, piranha solution (3:1 volume ratio of 98 % H<sub>2</sub>SO<sub>4</sub> and 30 % H<sub>2</sub>O<sub>2</sub>) was heated at 80 °C, when bubbles evolve at the surface of the solution, the cleaned substrate introduced in the solution for 10 min followed by cleaned with water. In the last step, the substrate has been cleaned with HF and then washed with water, followed by isopropanol washing.

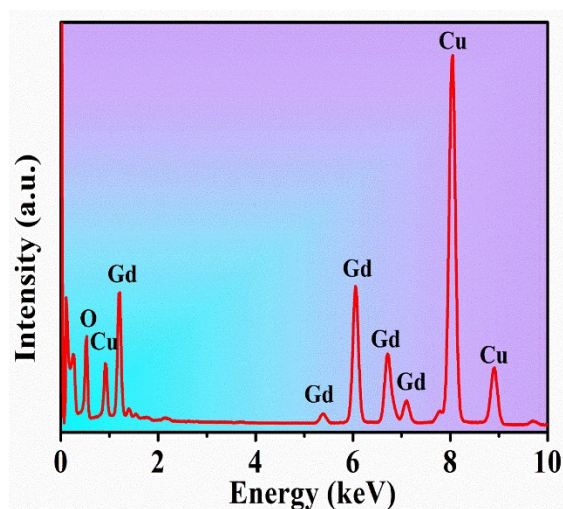

Fig. S1. EDX of Gd(OH)<sub>3</sub>

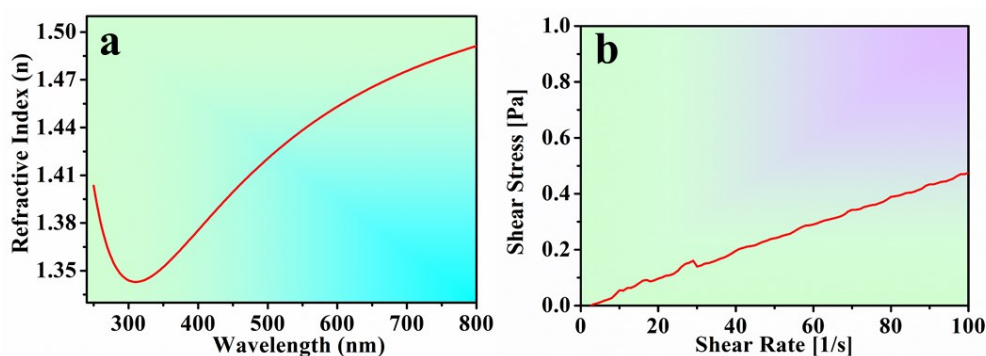

**Fig. S2.** (a) Refractive index of GdB<sub>6</sub>, (b) Viscosity of prepared ink

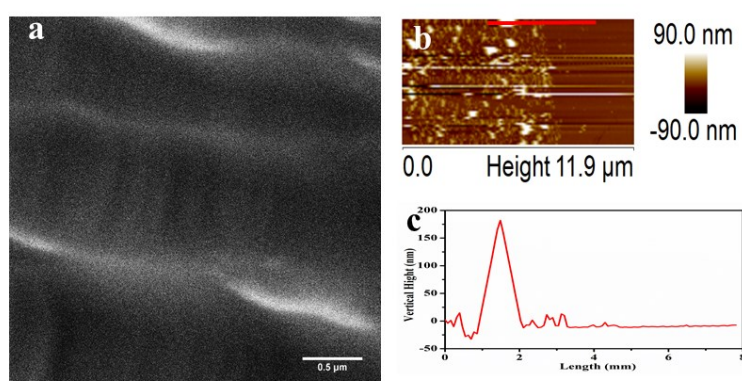

**Fig. S3.** (a) cross-sectional SEM of GdB<sub>6</sub> film, (b-c) AFM study for high profile

### Synthesis of GdB<sub>6</sub> nanocubes and their field emission

In the present study, for the synthesis of GdB<sub>6</sub> nanocubes, Gd(OH)<sub>3</sub> nanorods and NaBH<sub>4</sub> were mixed in 1:20 molar ratio and annealed in the presence of argon at 1000 °C for 8 h at a heating rate of 250 °C/h. The PXRD study of the as-obtained sample has been shown in **Fig. S4a**. All the diffraction pattern matched with GdB<sub>6</sub> having JCPDC card number 03-065-1826 with cubic space group (Pm-3m). Further, the TEM study reveals the formation of the irregular cubic particle of size 30-50 nm (**Fig. S4b**). As prepared GdB<sub>6</sub> nanocubes were further deposited on Si- substrate via spin coating method followed by slow drying. The AFM study of GdB<sub>6</sub> film show that the cubes are agglomerated (**Fig. S4c**). Further, the fabricated GdB<sub>6</sub> film has been utilized for the field emission study. J vs E plot of GdB<sub>6</sub> film fabricated using GdB<sub>6</sub> nanoparticles is shown in **Fig. S4d**. The observed turn-on field was ~5.3 V/μm. The F-N plot

( $\ln J/E^2$  vs  $1/E$ ) shows the linear plot at high field, confirms that the emission occurs due to tunnelling of energy barrier when the external electric field applied. However, the observed current density of GdB<sub>6</sub> film fabricated using GdB<sub>6</sub> nanocube was much lower than GdB<sub>6</sub> nanorods (Fig. S4d).

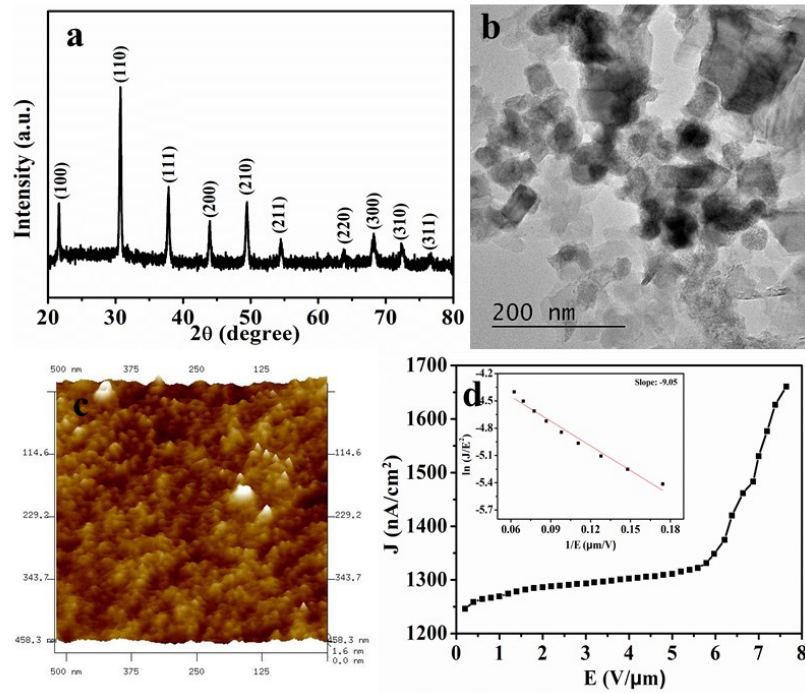

**Fig. S4.** (a) PXRD of GdB<sub>6</sub> nanoparticles, (b) TEM study of GdB<sub>6</sub>, (c) AFM study of GdB<sub>6</sub> nanocubes, (d) field emission study of GdB<sub>6</sub> nanocubes (inset F-N plot)
